# Supplementary material for: Ultra-fast vapor generation by a graphene nano-ratchet: a theoretical and simulation study
Source: Royal Society of Chemistry journal article supplement (doi:10.1039/c7nr05304e), 2017-01-01
Supplement: c7nr05304e1.pdf [file c7nr05304e1.pdf]

Supporting Information

**Ultra-fast Vapor Generation by a Graphene Nano-ratchet: a Theoretical and Simulation study**

Hongru Ding<sup>1,2,#</sup>, Guilong Peng<sup>1,2,#</sup>, Shenqiu Mo<sup>1,2</sup>, Dengke Ma<sup>1,2</sup>, S.W. Sharshir<sup>1,2</sup> and Nuo Yang<sup>1,2,\*</sup>

<sup>1</sup>State Key Laboratory of Coal Combustion, Huazhong University of Science and Technology (HUST), Wuhan 430074, P. R. China

<sup>2</sup>Nano Interface Center for Energy(NICE), School of Energy and Power Engineering, Huazhong University of Science and Technology (HUST), Wuhan 430074, P. R. China

# H. D. and G. P. contributed equally to this work.

Electronic mail: N.Y. ([nuo@hust.edu.cn](mailto:nuo@hust.edu.cn))

## SI. Molecular dynamic simulation details

|                               |                                                                                                                                                                                                              |                                       |                                                    |                    |                                |                                                                  |  |
|-------------------------------|--------------------------------------------------------------------------------------------------------------------------------------------------------------------------------------------------------------|---------------------------------------|----------------------------------------------------|--------------------|--------------------------------|------------------------------------------------------------------|--|
| <b>Method</b>                 | Non- Equilibrium MD                                                                                                                                                                                          |                                       |                                                    |                    |                                |                                                                  |  |
| <b>Potential</b>              |                                                                                                                                                                                                              |                                       |                                                    |                    |                                |                                                                  |  |
| <b>Function</b>               | $E = \sum_i \sum_j^{on\ aon\ b} \frac{k_c q_i q_j}{r_{ij}} + \frac{A}{r_{oo}^{12}} - \frac{B}{r_{oo}^6} + 4\epsilon \left[ \left( \frac{\sigma}{r} \right)^{12} - \left( \frac{\sigma}{r} \right)^6 \right]$ |                                       |                                                    |                    |                                |                                                                  |  |
| <b>Parameters<br/>(TIP4P)</b> | m <sub>O</sub>                                                                                                                                                                                               | m <sub>H</sub>                        | q <sub>M</sub> (C)                                 | q <sub>H</sub> (C) | R <sub>OM</sub> (Å)            | R <sub>coul,cut</sub> (Å)                                        |  |
|                               | 15.999                                                                                                                                                                                                       | 1.008                                 | -1.040                                             | 0.520              | 0.15                           | 8.5                                                              |  |
|                               | R <sub>OH</sub> (Å)                                                                                                                                                                                          | θ <sub>OH</sub> (°)                   | A × 10 <sup>-3</sup> (Kcal Å <sup>12</sup> /(mol)) |                    | B (Kcal Å <sup>6</sup> /(mol)) |                                                                  |  |
|                               | 0.9572                                                                                                                                                                                                       | 104.52                                | 600.0                                              |                    | 610.0                          |                                                                  |  |
| <b>Parameters<br/>(VDW)</b>   | Type of molecular                                                                                                                                                                                            | N <sub>2</sub> *                      | O <sub>2</sub> *                                   | C                  |                                | *Two centered LJ potential for N <sub>2</sub> and O <sub>2</sub> |  |
|                               | ε (Kcal/(mol*Å <sup>2</sup> ))                                                                                                                                                                               | 0.0725                                | 0.1034                                             | 0.05528            |                                |                                                                  |  |
|                               | Σ (Å)                                                                                                                                                                                                        | 3.32                                  | 2.99                                               | 3.415              |                                |                                                                  |  |
| <b>Simulation process</b>     |                                                                                                                                                                                                              |                                       |                                                    |                    |                                |                                                                  |  |
| <b>Ensemble</b>               | <b>Setting</b>                                                                                                                                                                                               |                                       |                                                    |                    |                                | <b>Purpose</b>                                                   |  |
| NVT                           | Time step (fs)                                                                                                                                                                                               | 1                                     | Runtime (ns)                                       | 3                  |                                | Relax structure                                                  |  |
|                               | Temperature (K)                                                                                                                                                                                              | 300                                   | Thermostat                                         | Nosé–Hoover        |                                |                                                                  |  |
|                               | Simulation cell (nm)                                                                                                                                                                                         | 13.6*12.2*22                          |                                                    |                    |                                |                                                                  |  |
|                               | Boundary condition                                                                                                                                                                                           | X, Y, Z:<br>periodic, periodic, fixed |                                                    |                    |                                |                                                                  |  |
| NVT                           | Runtime (ns)                                                                                                                                                                                                 | 8                                     | Temperature (K)                                    | 300                |                                | Record information                                               |  |
|                               | Simulation cell (nm)                                                                                                                                                                                         | 13.6*12.2*22                          |                                                    |                    |                                |                                                                  |  |
|                               | Boundary condition                                                                                                                                                                                           | X, Y, Z:<br>periodic, periodic, fixed |                                                    |                    |                                |                                                                  |  |

## SII. Test of timestep

In molecular dynamic simulations, the timestep size is constrained by the demand that the vibrational motion of the atoms be accurately tracked. Usually, timestep is limited to femtosecond scale [1]. To perform accurate but economic simulations, we made a test about different timesteps. We fix  $N_t$ ,  $A_{min}$  and  $\tan\alpha$  as 3,  $33.1\text{\AA}^2$  and 0.25, in this part. We calculate the pressure difference of MGCN with different timesteps at room temperature, the results are shown in Fig S1. The values of  $\Delta P$  change little when the timesteps are smaller than 1 fs. It shows that our simulation cell is large enough to overcome the finite size effect on calculating thermal conductivity. In all of the simulations of MGCN, we use 1 fs as the timestep.

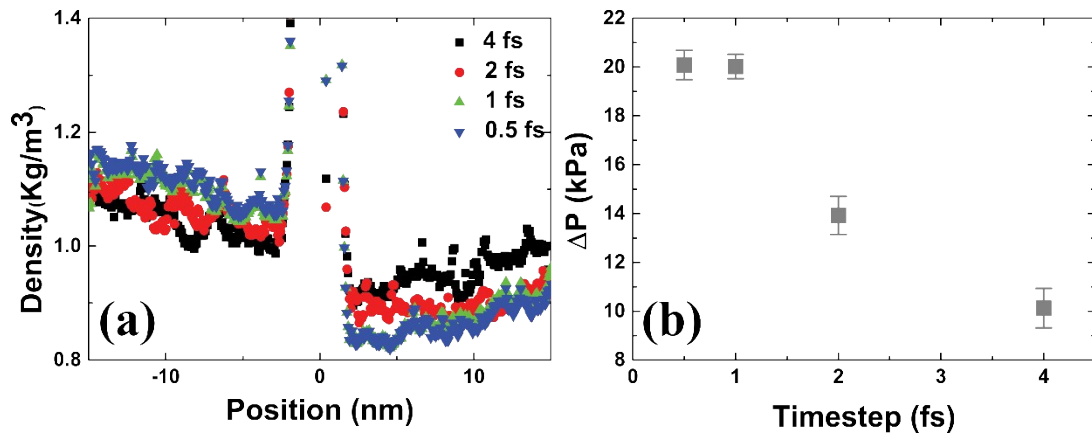

Figure S1. The density profile of saturated moist air molecules (a) and the pressure difference (b) with different timesteps. In this simulation, MGCN is constructed by 3 layers' graphene with cone-shaped nanopores. The area of minimum pore is  $33.1\text{\AA}^2$  and the cone angle  $\alpha$  is  $\arctan 0.25$ .

### SIII. Finite size effect

In this simulation, the finite size effect could arise if the simulation cell is not sufficiently large. As shown in Figure S2, we calculate the pressure difference  $\Delta P$  of MGCN with different sizes at room temperature. We fix the number of graphene layers  $N_l$ , the area of the minimum pore  $A_{min}$  and the cone angle  $\alpha$  as 2,  $33.1\text{\AA}^2$  and  $\arctan 0.25$ , respectively. The values of  $\Delta P$  change little when the size of simulation cell is larger than  $4 \times 4$  unit cells (UCs). It shows that our simulation cell is large enough to overcome the finite size effect on calculating ratchet transport. In all of the simulations of MGCN, we use  $4 \times 6$  UCs as simulation cell.

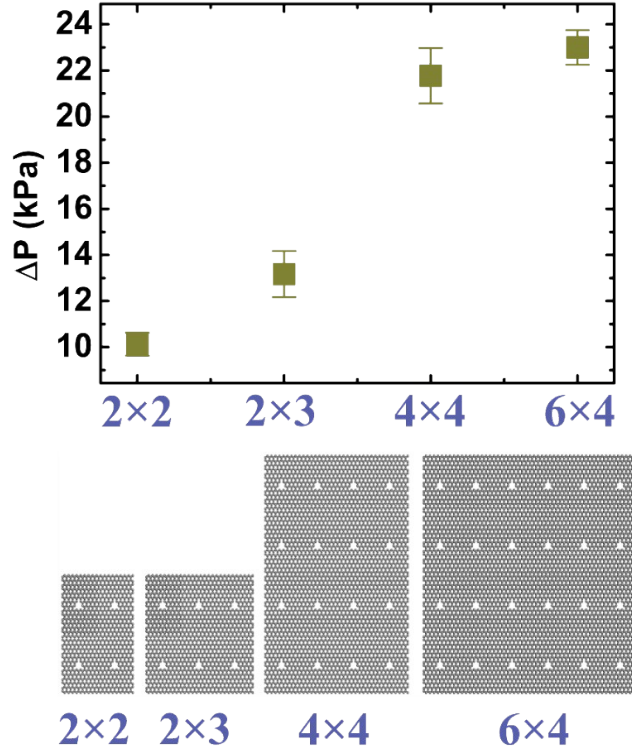

Figure S2. The pressure difference versus simulation cells. In this simulation, MGCN is constructed by 2 graphene layers with cone-shaped nanopores, where the area of minimum pore is  $33.1\text{\AA}^2$  and the cone angle  $\alpha$  is  $\arctan 0.25$ .

#### SIV. Dependence of ambient temperature

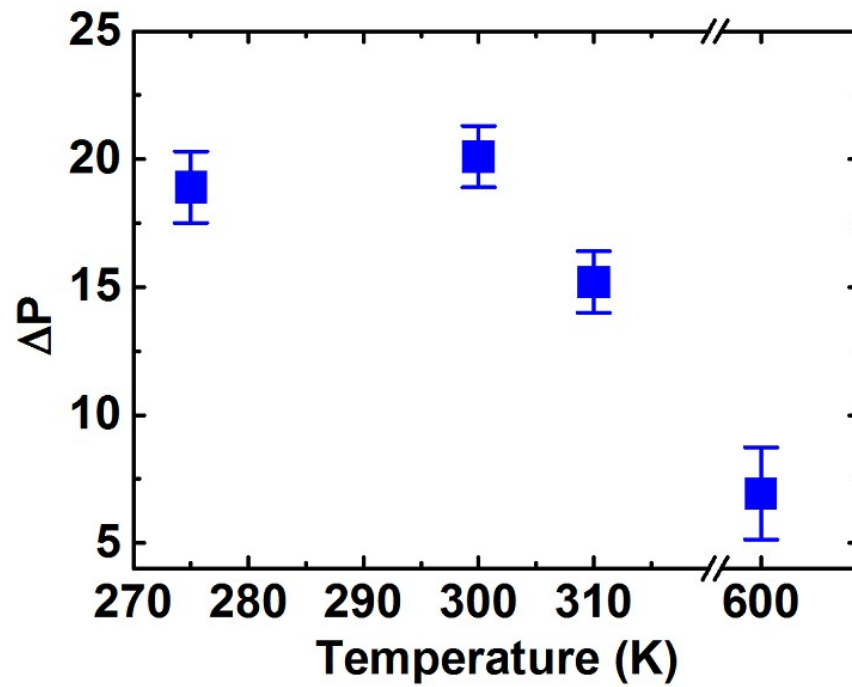

Figure S3. The pressure difference versus ambient temperature.  $\Delta P$  shows a significant reduction, when ambient temperature increase from 300 K to 600 K. In this simulation, MGCN is constructed by 4 graphene layers with cone-shaped nanopores, where the area of minimum pore is  $55.2 \text{ \AA}^2$  and the cone angle  $\alpha$  is  $\arctan 0.25$ .

## SV. Dependence of cone angle $\alpha$

$\Delta P$  also has nonmonotonic dependence on the cone angle  $\alpha$ . In the following cases,  $N_l$  and  $A_{min}$  are fixed as 3 and  $33.1 \text{ \AA}^2$ , respectively. As shown in Fig. 2(d), we get the biggest  $\Delta P$ , 20.1 kPa, when  $\tan\alpha$  is 0.25. Figure S4 shows the force distribution of MGCN with different  $\alpha$ . As for the reasons of the low  $\Delta P$  for the other three  $\alpha$ : on the one hand, the narrow nanochannel and many energy barriers of the small- $\alpha$  MGCN confine the ratchet effect; On the other hand, the strong diffusion transport and weak negative force of the big- $\alpha$  MGCN result in the low  $\Delta P$ . The discussions about diffusion transport are described in details below. That is why the adopted  $\tan\alpha$  of other simulations is fixed at 0.25 in this paper.

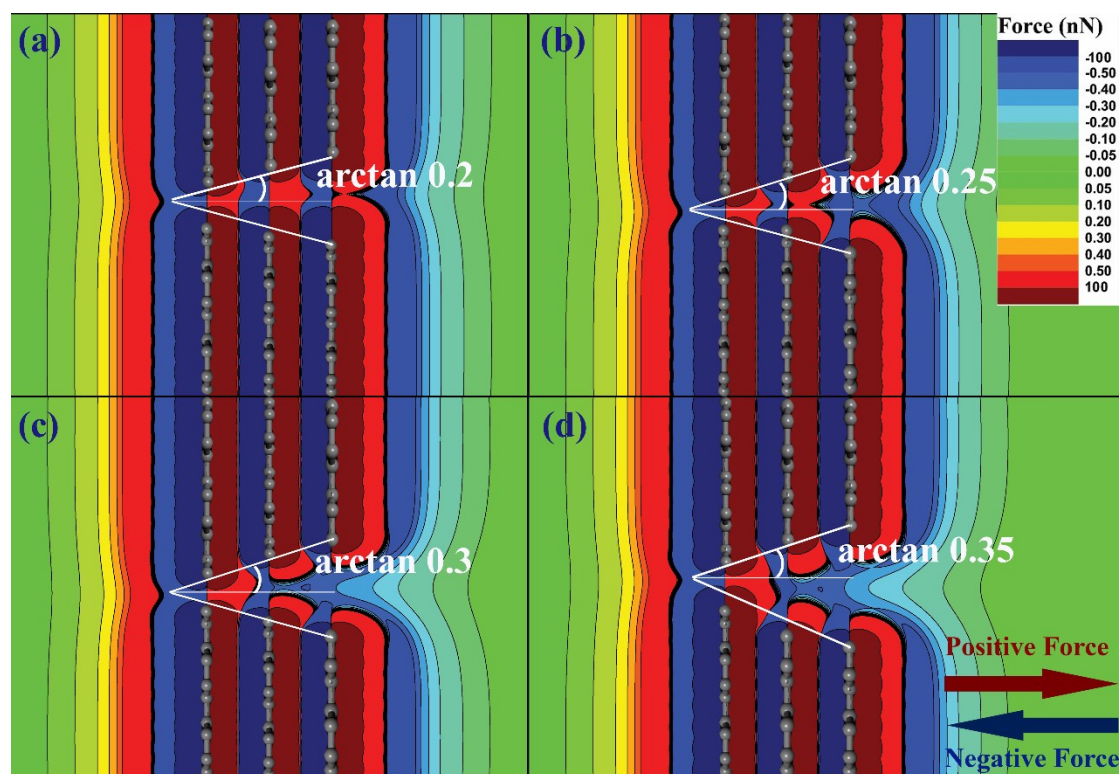

Figure S4. The number of graphene layers is fixed as 3; and the area of minimum pore  $A_m$  as  $33.1 \text{ \AA}^2$ . The force (along the Z direction) distribution of MGCN with different cone angle,  $\arctan 0.2$ -  $\arctan 0.35$ , are shown in (a)-(d). The arrows point out the

direction of positive and negative force.

## **SVI. Knudsen Diffusion**

Diffusive transport, resulted from the concentration difference, also affects the molecular transport. The molecules will move from the high concentration region to the low due to the diffusive transport, and this limits the further growth of concentration. Therefore, the final distribution of air depends on the competition between the ratchet transport (leftward) and diffusive transport (rightward). Since the scale length of the cone-shaped nanopores is much smaller than the mean free path of the air molecules, the Knudsen diffusion [2] occurs here. The Knudsen diffusion flux is defined as,

$$\Phi_k = -\frac{2}{3}\bar{r}u\frac{dC}{dz} \quad (S1)$$

$$\bar{r} = (r_{min} + r_{max})/2 \quad (S2)$$

$$r_{max} = r_{min} + (N_l - 1)htan\alpha \quad (S3)$$

where  $\bar{r}$  is the mean radius of the nanochannel,  $r_{min}$  and  $r_{max}$  are radiuses of the minimum and maximum pores.  $r_{min}$  equals to  $\sqrt{A_{min}/\pi}$ ;  $u$  is the characteristic

velocity of air molecules;  $\frac{dC}{dz}$  is the concentration gradient and  $h$  is the interlayer spacing of MGCN. In equation (S1),  $\bar{r}$  and  $\Phi_k$  are substituted by (S2)-(S3). Then equation (S1) can be defined as,

$$\Phi_K = -\frac{2r_{min} + (N_l - 1)htan\alpha}{3}u\frac{dC}{dz} \quad (S4)$$

## SVII. Evaporation enhancement calculation

According to Hertz-Knudsen Relation [3] as defined here:

$$\dot{m} = \left( \sigma_e \frac{P_S}{\sqrt{T_L}} - \sigma_c \frac{P_V}{\sqrt{T_a}} \right) \sqrt{\frac{M}{2\pi R}} \quad (S5)$$

where  $\dot{m}$  is the evaporation rate of the water,  $P_S$  and  $P_V$  are the water vapor saturate pressure and the real vapor partial pressure at the interface respectively.  $\sigma_e$  and  $\sigma_c$  are the evaporation and condensation coefficient, respectively.  $M$  is the molar mass of the water molecule.  $T_L$  and  $T_a$  are the temperature of the water and vapor at the interface respectively.

Normally,  $\sigma_e$  and  $\sigma_c$  are measured at the range of 0.001 to 1 and very close to each other [3-5].  $T_L$  is slightly higher than  $T_a$  when water is heated to evaporate.[6] And  $P_V$  is lower than  $P_S$  due to the lower vapor temperature and molecular diffusion. Therefore, the following assumptions are made: (i) The temperature discontinuity at the water-vapor interface is ignored, i.e.,  $T_L = T_a = T$ ; (ii) The difference between evaporation and condensation coefficient is ignored, i.e.,  $\sigma_e = \sigma_c = \varepsilon$ .

when MGCN is applied, the enhancement of evaporation,  $\eta_i$ , can be calculated as:

$$\eta_i = \frac{P_V - P_V'}{(P_S - P_V)} \times 100\% \quad (S6)$$

where  $P_V'$  and  $P_V$  are the real vapor saturate pressure at the interface with and without MGCN respectively. According to equation (1),  $P_V$  can be described as:

$$P_V = P_S - \frac{\dot{m}}{\varepsilon} \sqrt{\frac{2\pi RT}{M}} \quad (S7)$$



Meanwhile, as shown in Figure S4, due to the diffusion resistance, the vapor would accumulate on the high pressure side, which indicates that the pressure on the high pressure side of MGCN can be regarded as  $P_S$ . Therefore,  $P'_V$  can be determined by:

$$P'_V = \left(1 - \frac{\Delta P}{P_{atm}}\right) P_S \quad (S8)$$

where  $P_{atm}$  is the atmospheric pressure,  $\Delta P$  is the pressure difference between the two sides of MGCN. Hence,  $\eta_i$  can be described as:

$$\eta_i = \left( \frac{\varepsilon \cdot \Delta P \cdot P_S}{P_{atm} \dot{m}} \sqrt{\frac{M}{2\pi RT}} - 1 \right) \times 100\% \quad (S9)$$

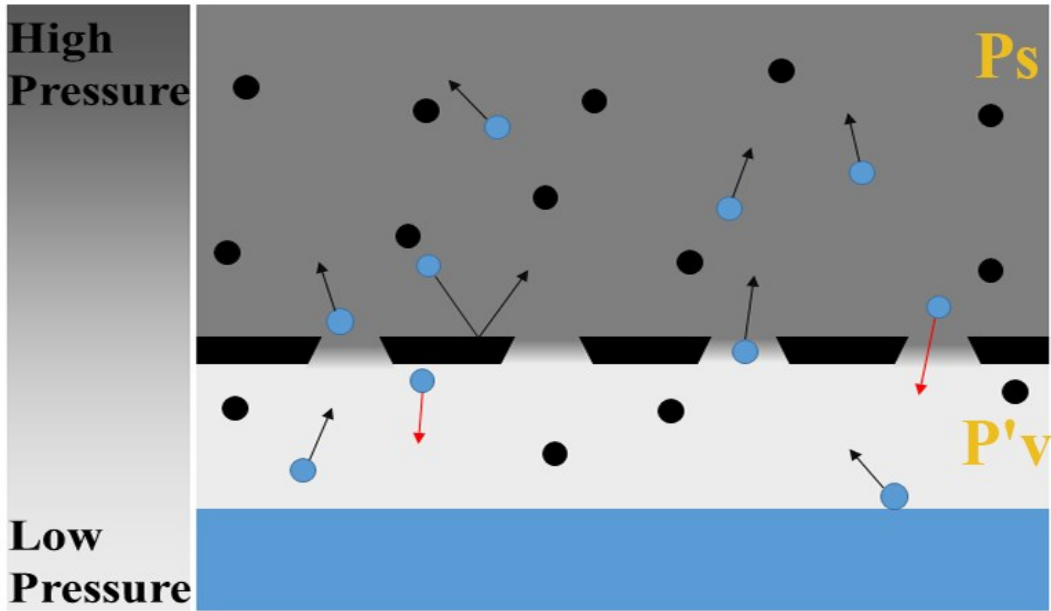

Figure S5. Vapor pressure on both sides of MGCN. The pressure at the interface,  $P'_V$ , is low due to the pumping by MGCN, the pressure on the other side is  $P_S$  due to the accumulation of vapor molecules.

## SVIII. Effect of pore chemistry

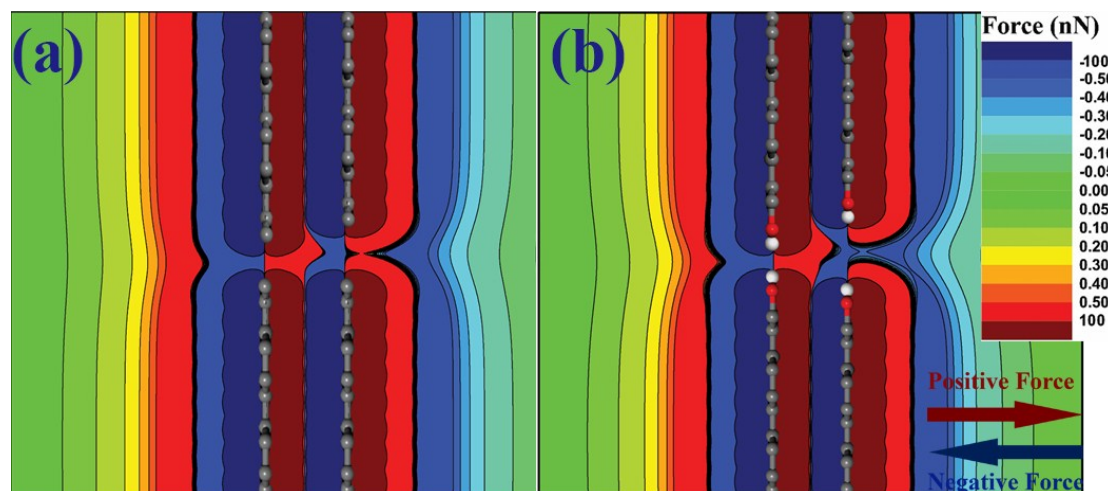

Figure S6. The force (along the Z direction) distributions of MGCN without (a) and with (b) hydroxyl groups. The number of graphene layers is 2. The area of minimum pore is  $33.1 \text{ \AA}^2$  and the cone angle is  $\arctan 0.25$ . The arrows point out the direction of positive and negative forces. The carbon (grey), oxygen (red) and hydrogen (white) atoms are shown to facilitate observation.

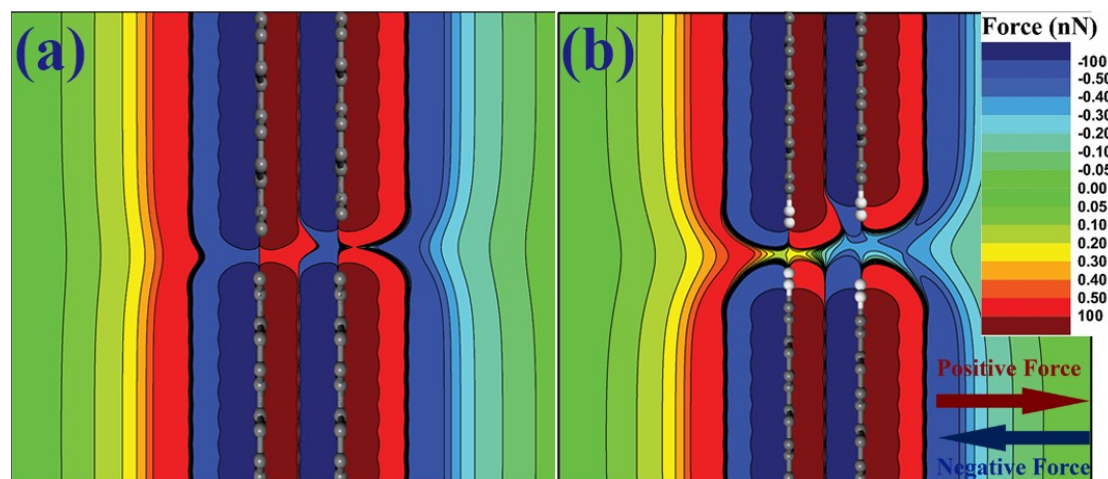

Figure S7. The force (along the Z direction) distributions of MGCN without (a) and with (b) hydrogen atoms. The number of graphene layers is 2. The area of minimum pore is  $33.1 \text{ \AA}^2$  and the cone angle is  $\arctan 0.25$ . The arrows point out the direction of positive and negative forces. The carbon (grey) and hydrogen (white) atoms are shown to facilitate observation.

## Reference

- [1] S. Plimpton, *J. Comput. Phys.*, 1995, **117**, 1.
- [2] M. Knudsen, *Ann. d. Phys.*, 1909, **333**,75.
- [3] A. H. Persad and C. A. Ward, *Chem. Rev.*, 2016, **116**, 7727.
- [4] I. W. Eames, N. J. Marr, and H. Sabir, *Int. J. Heat mass tran.*, 1997, **40**, 2963.
- [5] R. Marek and J. Straub, *Int. J. Heat mass tran.*, 2001, **44**, 39.
- [6] E. Y. Gatapova, I. A. Graur, O. A. Kabov, V. M. Aniskin, M. A. Filipenko, F. Sharipov and L. Tadrict, *Int. J. Heat Mass Tran.*, 2017, **104**, 800.
